# Supplementary material
Source: HighWire-hosted journal article supplement (https://erj.ersjournals.com/content/61/5/2300409)
Supplement: inline-supplementary-material-1 [file inline-supplementary-material-1.pdf]

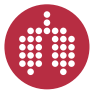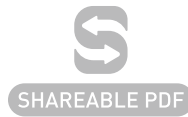

# Long COVID: clues about causes

Felicity Liew, Claudia Efstathiou  and Peter J.M. Openshaw 

National Heart and Lung Institute, Imperial College London, London, UK.

Corresponding author: Peter J.M. Openshaw ([p.openshaw@imperial.ac.uk](mailto:p.openshaw@imperial.ac.uk))

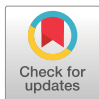

Shareable abstract (@ERSpublications)

**Scott *et al.* examined monocyte and inflammatory profiles in patients previously hospitalised with COVID-19. They propose localised lung injury causes post-COVID breathlessness, with inflammation affecting monocytes and tissue macrophages driving fatigue.** <https://bit.ly/40jXs2d>

**Cite this article as:** Liew F, Efstathiou C, Openshaw PJM. Long COVID: clues about causes. *Eur Respir J* 2023; 61: 2300409 [DOI: 10.1183/13993003.00409-2023].

This single-page version can be shared freely online.

Copyright ©The authors 2023.  
For reproduction rights and  
permissions contact  
[permissions@ersnet.org](mailto:permissions@ersnet.org)

Received: 8 March 2023  
Accepted: 14 March 2023

Many patients report persistent symptoms after resolution of acute COVID-19, regardless of SARS-CoV-2 variant and even if the initial illness is mild [1, 2]. A multitude of symptoms have been described under the umbrella term “long COVID”, otherwise known as “post-COVID syndrome” or “post-acute sequelae of SARS-CoV-2 (PASC)”; for simplicity we will use the term long COVID. Symptoms are diverse but include breathlessness, fatigue and brain fog, reported to affect up to 69% of cases [3]. Long COVID can be debilitating, with 45.2% of patients requiring a reduced work schedule [4]. The World Health Organization estimates that 17 million people in Europe experienced long COVID during the first 2 years of the pandemic [5]. SARS-CoV-2 variants continue to circulate and the risk of post-acute complications remains; a recent study of 56 003 UK patients found that even after Omicron infection, 4.5% suffered persistent symptoms [6]. It is therefore likely that long COVID will provide a substantial medical and economic burden for the foreseeable future. There is an urgent need to understand the mechanisms of the disease and develop effective treatments based on this understanding.
